# Supplementary material for: Autophagic degradation of lamins facilitates the nuclear egress of herpes simplex virus type 1
Source: PubMed Central journal article supplement — J Cell Biol. 2019 Feb 4;218(2):508–23. doi: 10.1083/jcb.201801151 (PMC6363456; doi:10.1083/jcb.201801151), 2019-02-04
Supplement: JCB_201801151_sm.pdf [file JCB_201801151_sm.pdf]

Supplemental material

Turan et al., <https://doi.org/10.1083/jcb.201801151>

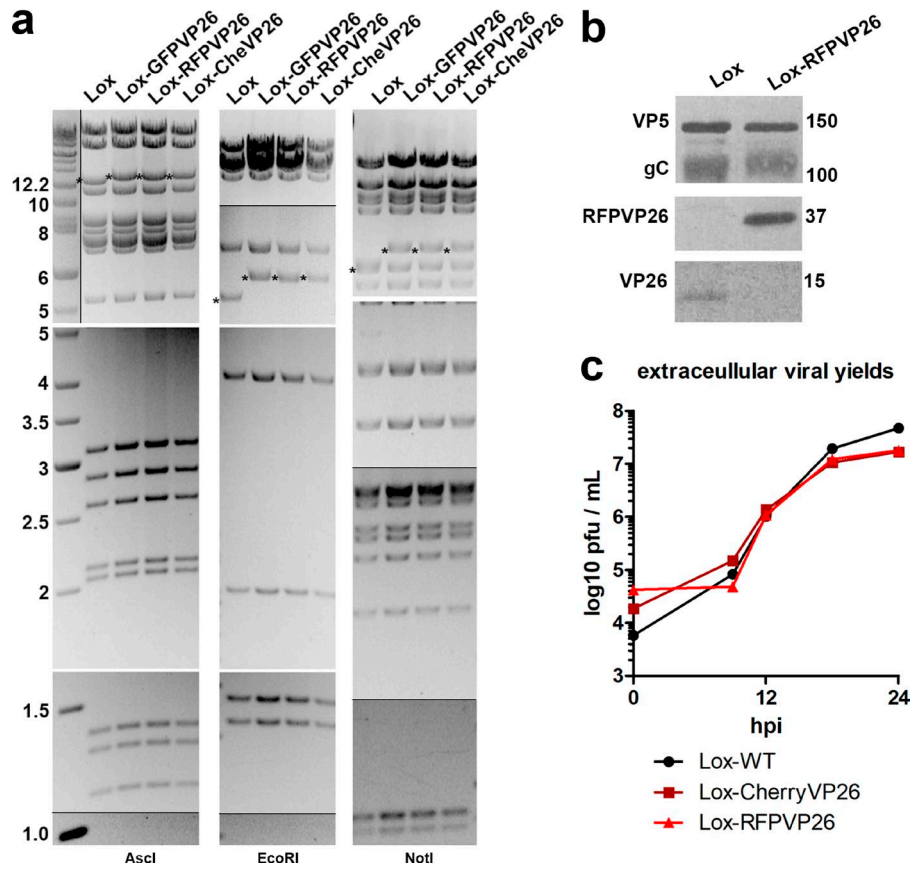

Figure S1. **Characterization of HSV1(17<sup>+</sup>)Lox-mRFPVP26.** (a) Agarose gel electrophoresis of restriction digests of pHSV1(17<sup>+</sup>)Lox, pHSV1(17<sup>+</sup>)Lox-EGFPVP26, HSV1(17<sup>+</sup>)Lox-mRFPVP26, and pHSV1(17<sup>+</sup>)Lox-CheVP26 with AscI, EcoRI, and NotI. All BACs showed the expected band shifts (\*), which were calculated based on the published sequences of HSV1(17<sup>+</sup>) (GenBank accession number NC\_001806). (b) Incorporation of RFP VP26 into mature extracellular viral particles was analyzed by immunoblotting.  $6 \times 10^7$  or  $1.3 \times 10^7$  PFUs per lane of HSV1(17<sup>+</sup>)Lox or HSV1(17<sup>+</sup>)Lox-mRFPVP26, respectively, were loaded onto a 6–18% gradient gel, transferred onto nitrocellulose, and probed with antibodies against anti-VP5, anti-gC, and anti-VP26. (c) For single-step growth kinetics, Vero cells were infected with 5 PFUs/ml HSV1(17<sup>+</sup>)Lox, HSV1(17<sup>+</sup>)Lox-CherryVP26, or HSV1(17<sup>+</sup>)Lox-mRFPVP26, and secreted infectious virus at the indicated time points was titrated on Vero cells. This experiment was performed twice.

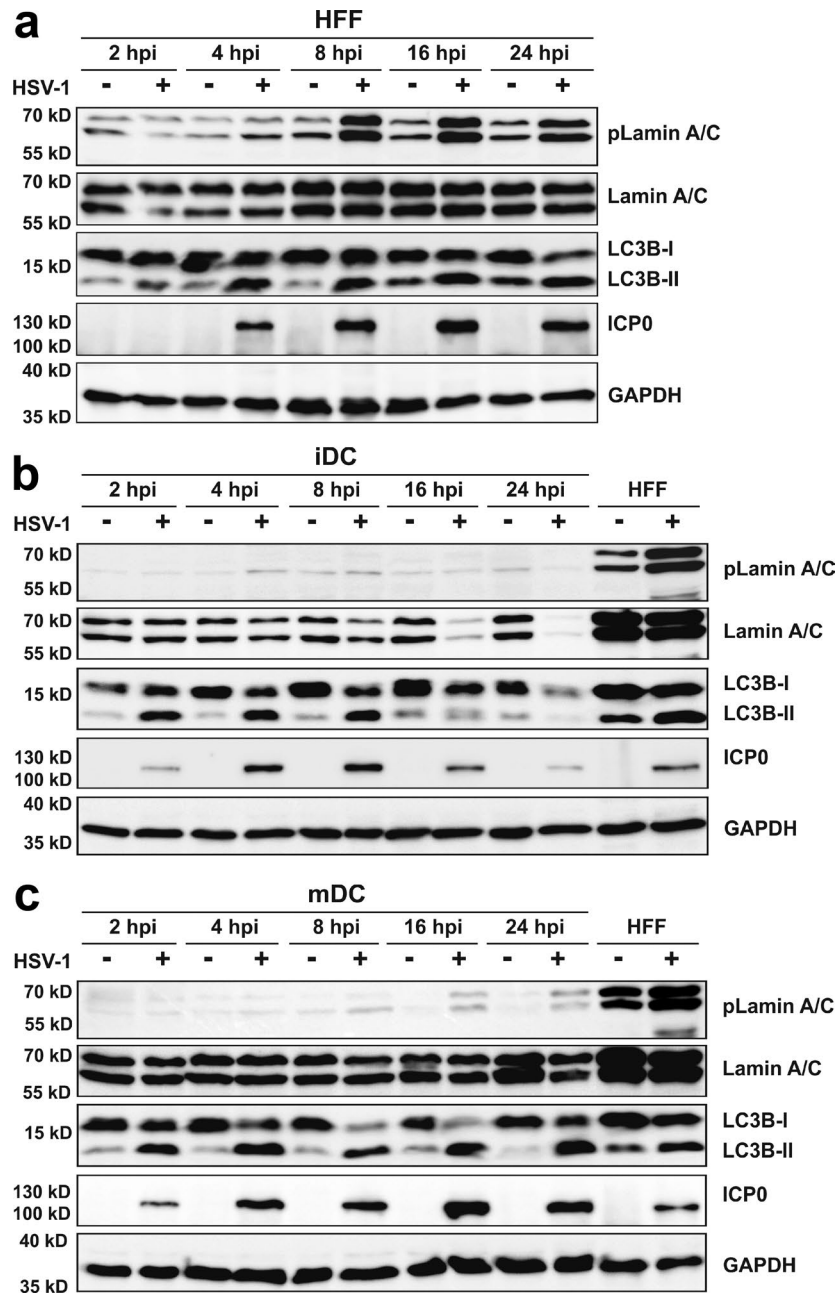

Figure S2. **Lack of lamin A/C phosphorylation in HSV-1-infected iDCs and mDCs.** (a–c) HFF (a), iDCs (b), and mDCs (c;  $2 \times 10^6$ ) were mock- or HSV-1-infected and harvested at the indicated time points after infection. Cells were lysed and protein lysates were subjected to immunoblot analyses. Specific antibodies raised against phospho-lamin A/C (pLamin A/C), lamin A/C, LC3B, ICP0, or GAPDH (as an internal loading control) were used. Experiments were performed at least three times with cells from different healthy donors.

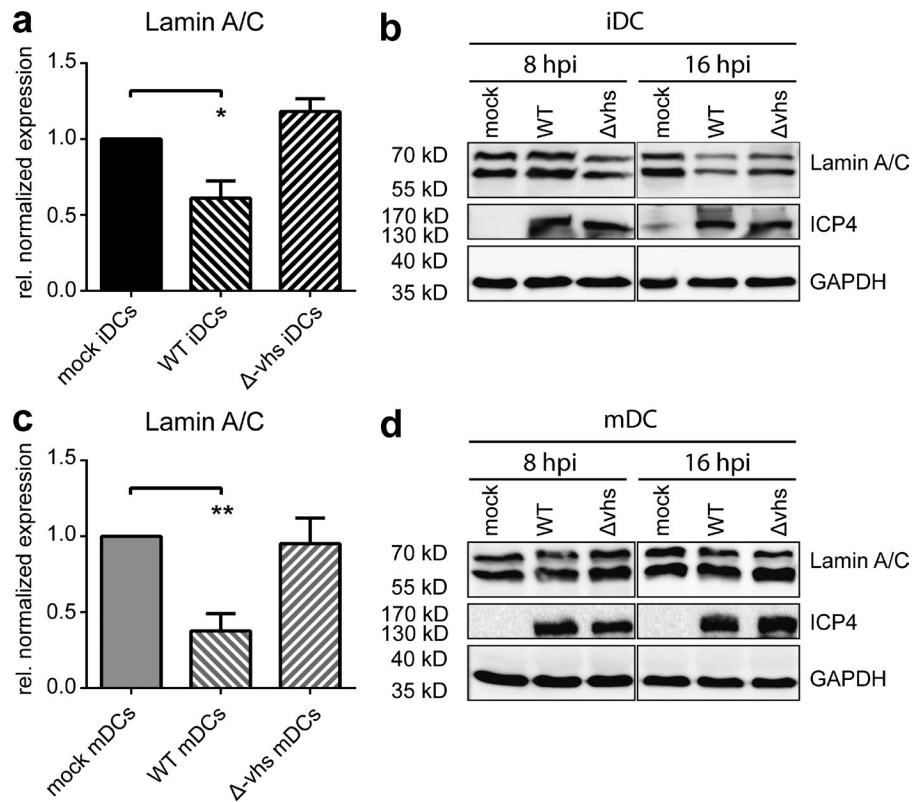

Figure S3. **Loss of lamin A/C protein levels is independent from its transcriptional regulation.** (a–d) iDCs (a and b) and mDCs (c and d) were mock-, HSV-1 WT-, or HSV-1 Δvhs-infected. For expression analyses of lamin A/C mRNA via quantitative real-time PCR, cells were harvested 8 hpi (a and c). For protein expression analyses of lamin A/C using immunoblotting, samples were analyzed 8 and 16 hpi (b and d). Specific antibodies raised against lamin A/C, ICP4, or GAPDH (as an internal loading control) were used. Error bars indicate SEM. Significant changes are indicated by asterisks (\*,  $P < 0.05$ ; \*\*,  $P < 0.01$ ). Experiments were performed at least three times with cells of different healthy donors.

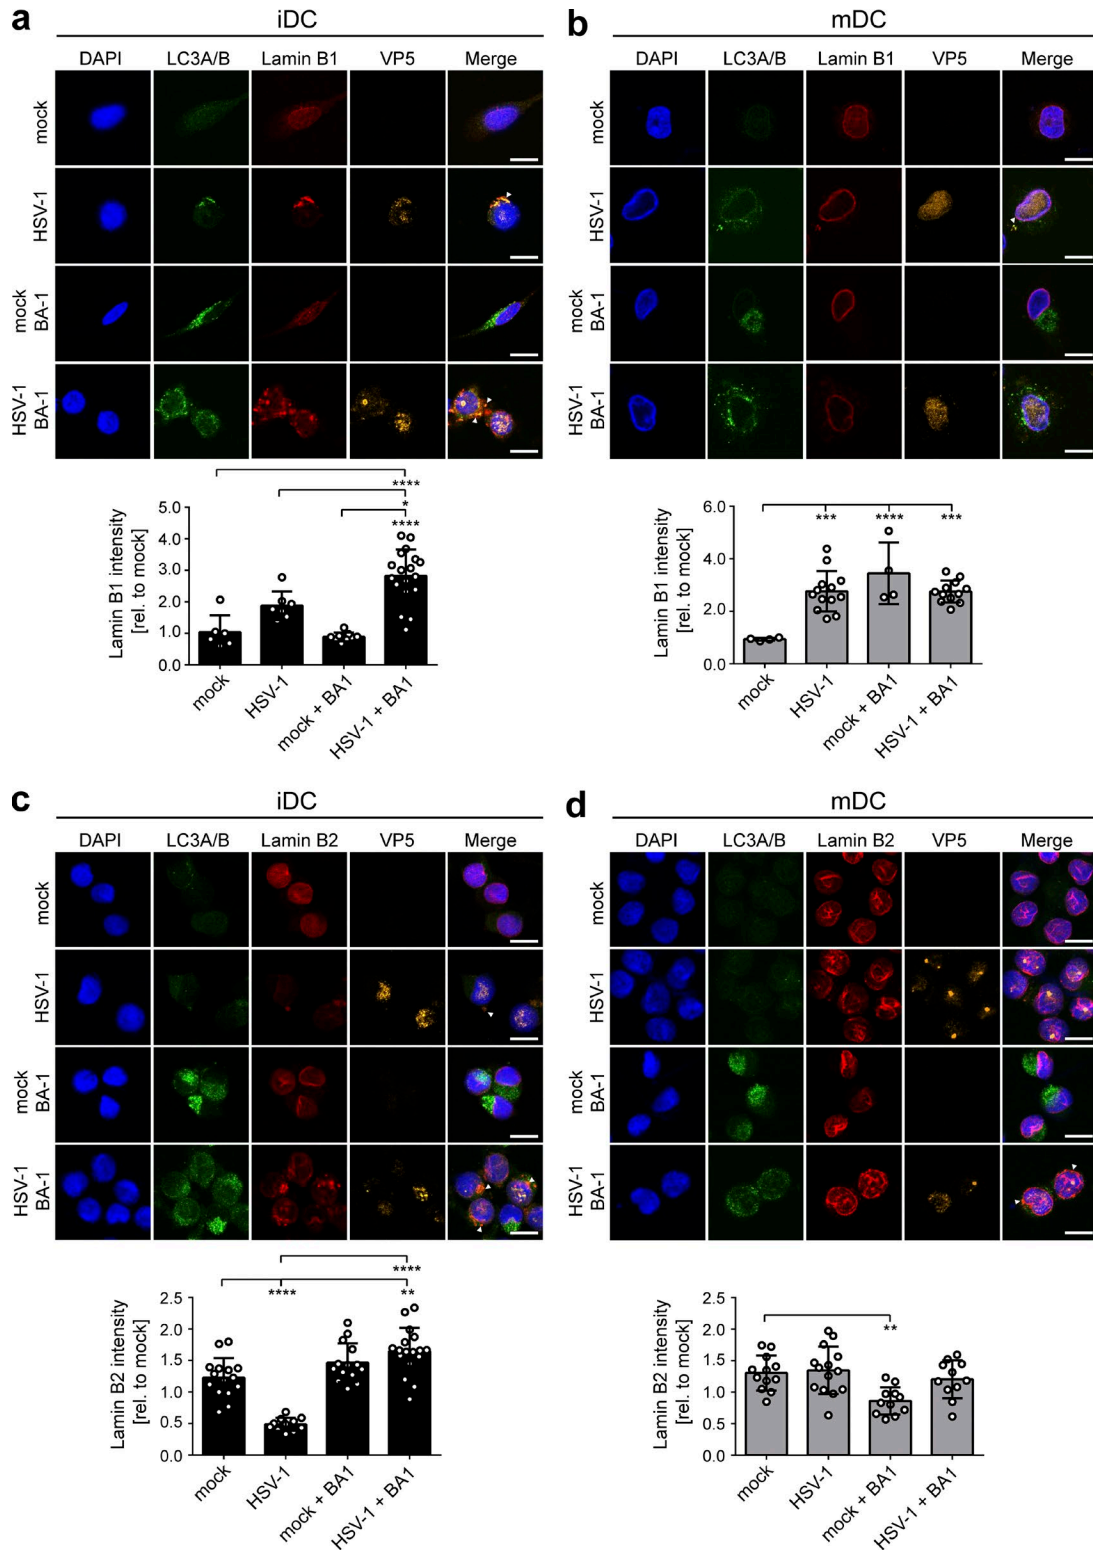

Figure S4. **Nuclear lamin proteins are cargos of autophagosomes in iDCs and mDCs.** (a–d) iDCs (a and c) and mDCs (b and d) were mock- or HSV-1-infected and treated with or without BA-1. After 24 h of incubation, cells were analyzed via immunofluorescence for expression of LC3A/B (green) and lamin B1 (a and b) or lamin B2 (red; c and d). VP5 (orange) indicates viral capsids. We quantified lamin B1 (a and b) and lamin B2 (c and d) immunofluorescence mean signal intensities. Values are shown relative to mock signal (lamin B1: iDC mock,  $n = 6$ ; iDC HSV-1,  $n = 7$ ; iDC mock + BA1,  $n = 9$ ; iDC HSV-1 + BA1,  $n = 18$ ; mDC mock,  $n = 4$ ; mDC HSV-1,  $n = 13$ ; mDC mock + BA1,  $n = 4$ ; mDC HSV-1 + BA1,  $n = 12$ ; lamin B2: iDC mock,  $n = 15$ ; iDC HSV-1,  $n = 11$ ; iDC mock + BA1,  $n = 14$ ; iDC HSV-1 + BA1,  $n = 17$ ; mDC mock,  $n = 12$ ; mDC HSV-1,  $n = 14$ ; mDC mock + BA1,  $n = 11$ ; mDC HSV-1 + BA1,  $n = 11$ ). Error bars indicate SD. Significant changes were analyzed using one-way ANOVA and Bonferroni multiple comparison post hoc tests and are indicated by asterisks (\*,  $P < 0.05$ ; \*\*,  $P < 0.01$ ; \*\*\*,  $P < 0.001$ ; \*\*\*\*,  $P < 0.0001$ ). Nuclei were stained using DAPI (blue). Scale bars, 10  $\mu\text{m}$ . Arrowheads indicate colocalization of LC3A/B and lamin proteins.

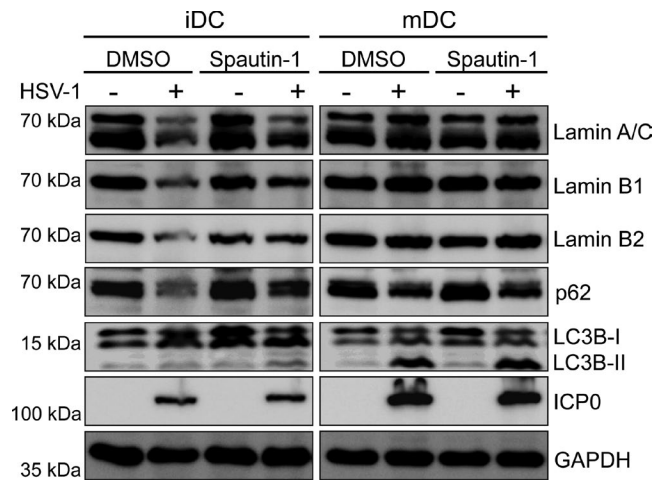

Figure S5. **Treatment with the autophagy inhibitor spautin-1 reduces lamin degradation in HSV-1-infected iDCs.** iDCs or mDCs ( $3 \times 10^6$ ) were pre-treated with spautin-1 or DMSO for 1 h before infection. Subsequently, iDCs and mDCs were mock- or HSV-1-infected. Cells were harvested 18 hpi and subjected to Western blot analysis. Protein levels of lamin A/C, lamin B1, lamin B2, and LC3B were determined using Western blot analyses. Infection efficiency was checked by ICP0, and GAPDH was used as a loading control. The experiment was performed at least three times with cells of different healthy donors.

Table S1. **Antibodies used for immunoblot, immunofluorescence, and immunoprecipitation**

| Antibody                    | Clone      | Origin | Application | Supplier/reference                     |
|-----------------------------|------------|--------|-------------|----------------------------------------|
| Anti-ARL8 A/B               | H-8        | Mouse  | IB          | Santa Cruz Biotechnology               |
| Anti-GAPDH                  | 6C5        | Mouse  | IB          | Millipore                              |
| Anti-GAPDH                  | 14C10      | Rabbit | IB          | Cell Signaling                         |
| Anti-gC                     | Polyclonal | Rabbit | IB          | <a href="#">Eisenberg et al., 1987</a> |
| Anti-ICP0                   | 11060      | Mouse  | IB          | Santa Cruz Biotechnology               |
| Anti-ICP4                   | 10F1       | Mouse  | IB          | Santa Cruz Biotechnology               |
| Anti-ICP5 (VP5)             | 3B6        | Mouse  | IB, IF      | Santa Cruz Biotechnology               |
| Anti-VP5                    | H1.4       | Mouse  | IB          | Meridian Life Science                  |
| Anti-KIF1B                  | E-12       | Mouse  | IB          | Santa Cruz Biotechnology               |
| Anti-KIF2A                  | D-7        | Mouse  | IB          | Santa Cruz Biotechnology               |
| Anti-FIP200                 | D10D11     | Rabbit | IB          | Cell Signaling                         |
| Anti-lamin A/C              | E-1        | Mouse  | IB          | Santa Cruz Biotechnology               |
| Anti-lamin A/C              | 2032S      | Rabbit | IB, IF      | Cell Signaling                         |
| Anti-lamin B1               | A11        | Mouse  | IB          | Santa Cruz Biotechnology               |
| Anti-lamin B1               | D4Q4Z      | Rabbit | IB          | Cell Signaling                         |
| Anti-lamin B1               | Polyclonal | Rabbit | IF          | Santa Cruz Biotechnology               |
| Anti-lamin B2               | F-8        | Mouse  | IB          | Santa Cruz Biotechnology               |
| Anti-lamin B2               | D8P3U      | Rabbit | IB, IF      | Cell Signaling                         |
| Anti-LC3B                   | D11        | Rabbit | IB, IP      | Cell Signaling                         |
| Anti-LC3B                   | Polyclonal | Mouse  | IP          | Santa Cruz Biotechnology               |
| Anti-mTOR                   | L27D4      | Mouse  | IB          | Cell Signaling                         |
| Anti-p62                    | D5L76      | Mouse  | IB          | Cell Signaling                         |
| Anti-p62                    | D5E2       | Rabbit | IB          | Cell Signaling                         |
| Anti-p-mTOR                 | D9C2       | Rabbit | IB          | Cell Signaling                         |
| Anti-VP26                   | Polyclonal | Rabbit | IB          | <a href="#">Desai et al., 1998</a>     |
| Anti-mouse HRP              | Polyclonal | Horse  | IB          | Cell Signaling                         |
| Anti-rabbit HRP             | Polyclonal | Goat   | IB          | Cell Signaling                         |
| Anti-LAMP-1-Alexa Fluor 647 | 1D4B       | Rat    | IF          | Santa Cruz Biotechnology               |
| Anti-LC3A/B-Alexa Fluor 488 | D3U4C      | Rabbit | IF          | Cell Signaling                         |
| Anti-rabbit Cy3             | Poly4064   | Donkey | IF          | BioLegend                              |
| Anti-rabbit Alexa Fluor 568 | Polyclonal | Goat   | IF          | Invitrogen                             |
| Anti-mouse Alexa Fluor 647  | Polyclonal | Goat   | IF          | Invitrogen                             |

IB, immunoblot; IF, immunofluorescence; IP, immunoprecipitation.

Table S2. Raw data from mass spectrometry analysis of LC3B IP samples with three different donors

| Protein                           | p62/SQSTM1            | Lamin A/C            | Lamin B1               | Lamin B2              |
|-----------------------------------|-----------------------|----------------------|------------------------|-----------------------|
| UniProt accession number and name | Q13501<br>SQSTM_HUMAN | P02545<br>LMNA_HUMAN | E9PBF6<br>E9PBF6_HUMAN | Q03252<br>LMNB2_HUMAN |
| iDCs mock D1                      | 7.98E5                | 1.27E5               | 5.15E5                 | 4.6E4                 |
| iDCs mock D2                      | 1.74E6                | 4.82E4               | 3.97E5                 | 8.68E4                |
| iDCs mock D3                      | 1.82E6                | 2.37E5               | 8.17E5                 | 5.74E4                |
| iDCs HSV-1 D1                     | 4.54E4                | 4.77E3               | 7.83E4                 | 0.00E+00              |
| iDCs HSV-1 D2                     | 6.25E5                | 2.12E5               | 6.92E5                 | 1.01E5                |
| iDCs HSV-1 D3                     | 1.38E5                | 3.04E4               | 5.94E4                 | 4.55E3                |
| mDCs mock D1                      | 8.5E5                 | 1.84E5               | 6.05E5                 | 4.71E4                |
| mDCs mock D2                      | 1.53E6                | 9.68E4               | 7.5E4                  | 3.95E4                |
| mDCs mock D3                      | 1.39E6                | 1.11E5               | 2.89E4                 | 4.33E3                |
| mDCs HSV-1 D1                     | 4.03E5                | 1.49E5               | 6.54E5                 | 4.95E4                |
| mDCs HSV-1 D2                     | 8.12E5                | 1.2E5                | 2.13E5                 | 4.8E4                 |
| mDCs HSV-1 D3                     | 2.9E5                 | 1.15E5               | 2.33E5                 | 9.7E3                 |

D, donor.

Provided online is a supplemental ZIP file containing two custom-written macros. The custom-written macro for the quantification of HSV1-RFPVP26 signals located inside versus outside the nucleus is designated as MacroCapsidLocalization. The custom-written macro for the quantification of lamin and LC3B immunofluorescence signal intensities is designated as MacroLaminLC3B.

## References

- Desai, P., N.A. DeLuca, and S. Person. 1998. Herpes simplex virus type 1 VP26 is not essential for replication in cell culture but influences production of infectious virus in the nervous system of infected mice. *Virology*. 247:115–124. <https://doi.org/10.1006/viro.1998.9230>
- Eisenberg, R.J., M. Ponce de Leon, H.M. Friedman, L.F. Fries, M.M. Frank, J.C. Hastings, and G.H. Cohen. 1987. Complement component C3b binds directly to purified glycoprotein C of herpes simplex virus types 1 and 2. *Microb. Pathog.* 3:423–435. [https://doi.org/10.1016/0882-4010\(87\)90012-X](https://doi.org/10.1016/0882-4010(87)90012-X)
